# Supplementary material
Source: PubMed Central journal article supplement (PMC5537729)
Supplement: NIHMS826604-supplement-Table_S1-2.pdf [file NIHMS826604-supplement-Table_S1-2.pdf]

Table SI-2: Regression parameters ( $\beta$  (95% CI)) for log-transformed ethyl paraben (EtP) and butyl paraben (BuP) urinary total concentrations (ng/mL) with outliers removed (n=23 pooled samples)

|                | EtP                             | BuP                            |
|----------------|---------------------------------|--------------------------------|
| Intercept      | 4.129<br>(3.640 to 4.619)       | 2.168<br>(1.696 to 2.641)      |
| Age<br>(years) | -0.019***<br>(-0.029 to -0.009) | -0.014**<br>(-0.024 to -0.004) |
| Sex            | -0.216<br>(-0.725 to -0.294)    | -0.829**<br>(-1.321 to -0.337) |
| R <sup>2</sup> | 0.456                           | 0.521                          |

\*p<0.05; \*\*p<0.01; \*\*\*p<0.001
